# Supplementary material for: Exposure of Pseudomonas aeruginosa to Cinnamaldehyde Selects Multidrug Resistant Mutants
Source: MDPI journal article supplement (doi:10.3390/antibiotics11121790), 2022-12-10
Supplement: s1 [file s1]

**Figure S1. Phylogenetic tree of CNA-adaptation mutants derived from PA14.** Mutants CNA-A1 to A3 were selected on a fixed concentration (Method A) of CNA (900  $\mu\text{g/mL}$ ) for 10 days. Mutants CNA-B1 to B7 were selected on increasing CNA concentrations (Method B), after 5 days (CNA-B1, B2 and B3) or 10 days of exposure (CNA-B4, B5, B6 and B7). Posterior probability, representing the fraction of trees where this split is observed, is indicated at branches.

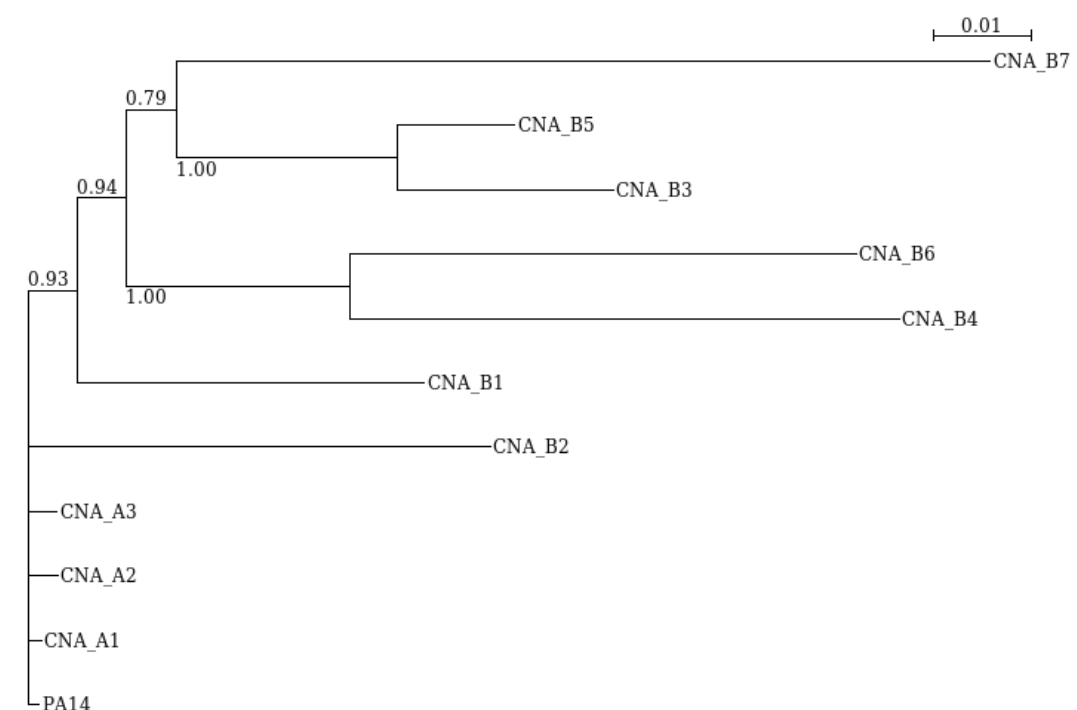

**Figure S2. Structural alignment of NalC N-terminal region (1-108 over 209 amino acids) with representative TetR family proteins of known structures.** TetR from *Escherichia coli* (UniProt code P0ACT4; PDB code 1QPI), TetR from of *Mesorhizobium japonicum* (UniProt code Q98D70; PDB code 3BHQ), DesT from *Pseudomonas aeruginosa* (UniProt code Q9HUS3; PDB code 3LSP), LuxR from *Vibrio cholerae* (UniProt code B4X9Q4; PDB code 7AMN) and MtrR from *Neisseria gonorrhoea* (UniProt code P39897; PDB code 7JPN). Alignment was made with ESPrpt program [1]. Predicted secondary structure of NalC model is shown above the aligned sequences ( $\alpha$  = helix  $\alpha$ ). Conserved residues are indicated in red and consensus residues are indicated in yellow. Mutation T<sub>24</sub>P in NalC is indicated with an arrow. NalC exhibits 24.4%, 20.9%, 23.4%, 20.7% and 20% of sequence identity with TetR *M. japonicum*, TetR *E. coli*, DesT, LuxR and MtrR, respectively (Clustal Omega; [2]). DNA binding domain, overlapping helix  $\alpha$ 1-3 (from residue 27 to 48), is represented as a blue arrow.

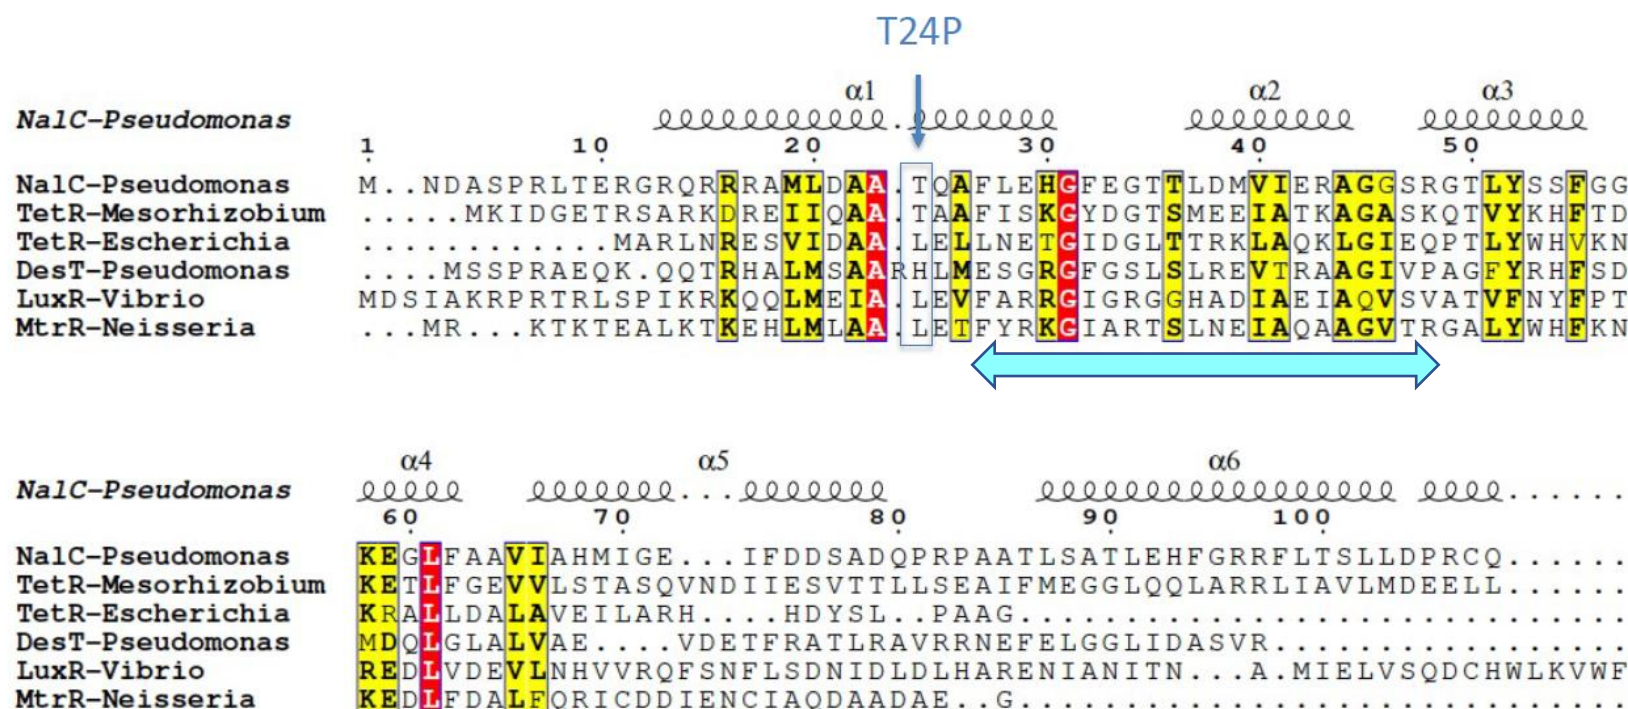

**Figure S3. NalC model (homodimer) with a cognate DNA.** The model of NalC homodimer in complex with DNA was generated based on the superposition of NalC model with TetR-DNA crystal structure from *E. coli* (PDB code 1QIN) using PyMOL program (Molecular Graphics System, Version 2.0 Schrödinger, LLC). One of NalC monomers is represented in rainbow colors (from N-terminal blue to C-terminal red). The  $\alpha$ -helix numbering nomenclature is indicated according to TetR structure. Hydrogen bonds are shown as yellow dashed-lines. The NalC putative substrate-binding site was defined according to the superposition of NalC with TetR tetracycline binding pocket (indicated in pink). Because of the T<sub>24</sub>P substitution, the hydrogen bond with R106 of helix  $\alpha$ 7 and intra-chain hydrogen bond of helix  $\alpha$ 1 is expected to be disrupted.

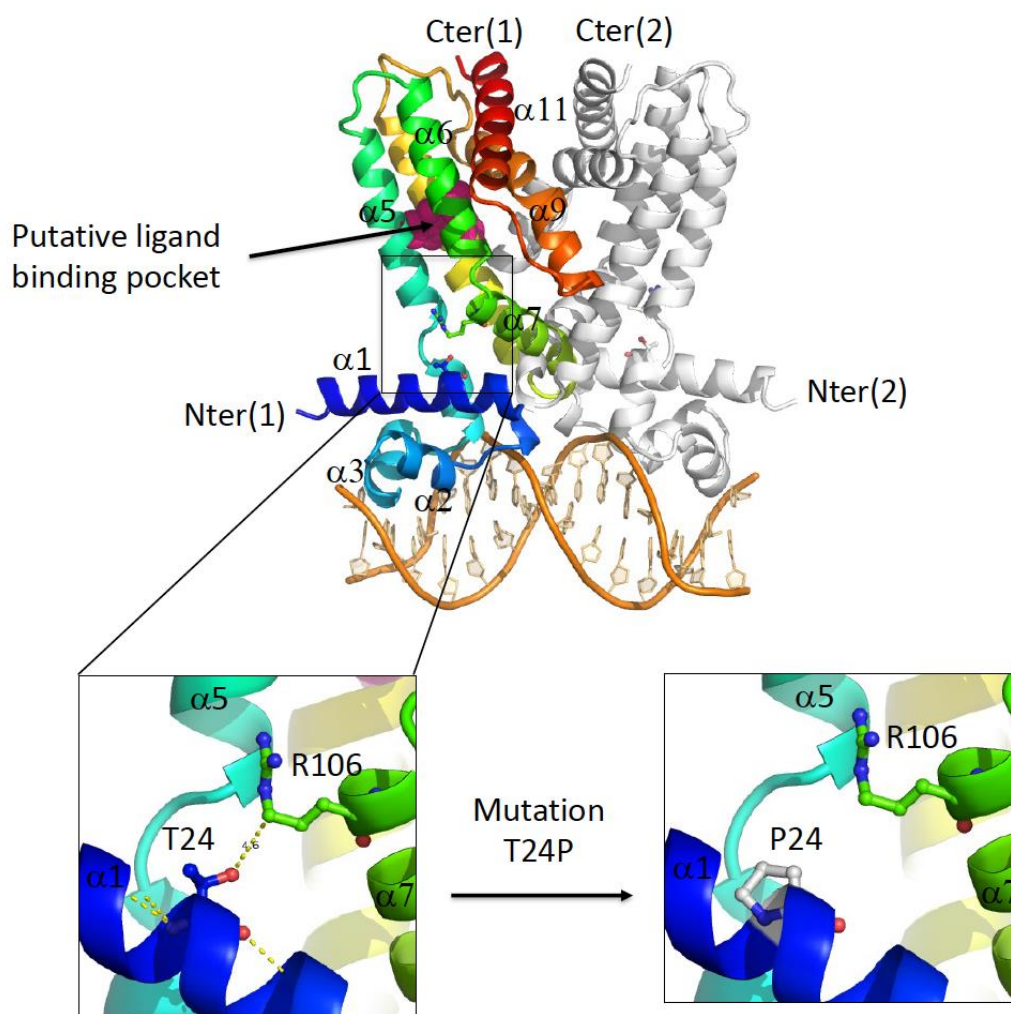

**Figure S4. CNA degradation and conversion into cinnamic alcohol (CNOH) in PA14, A-type and B-type CNA-adaptation mutants.** CNA and CNOH were assayed from culture supernatant by thin-layer chromatography 1h after addition of 1 mg/mL CNA.

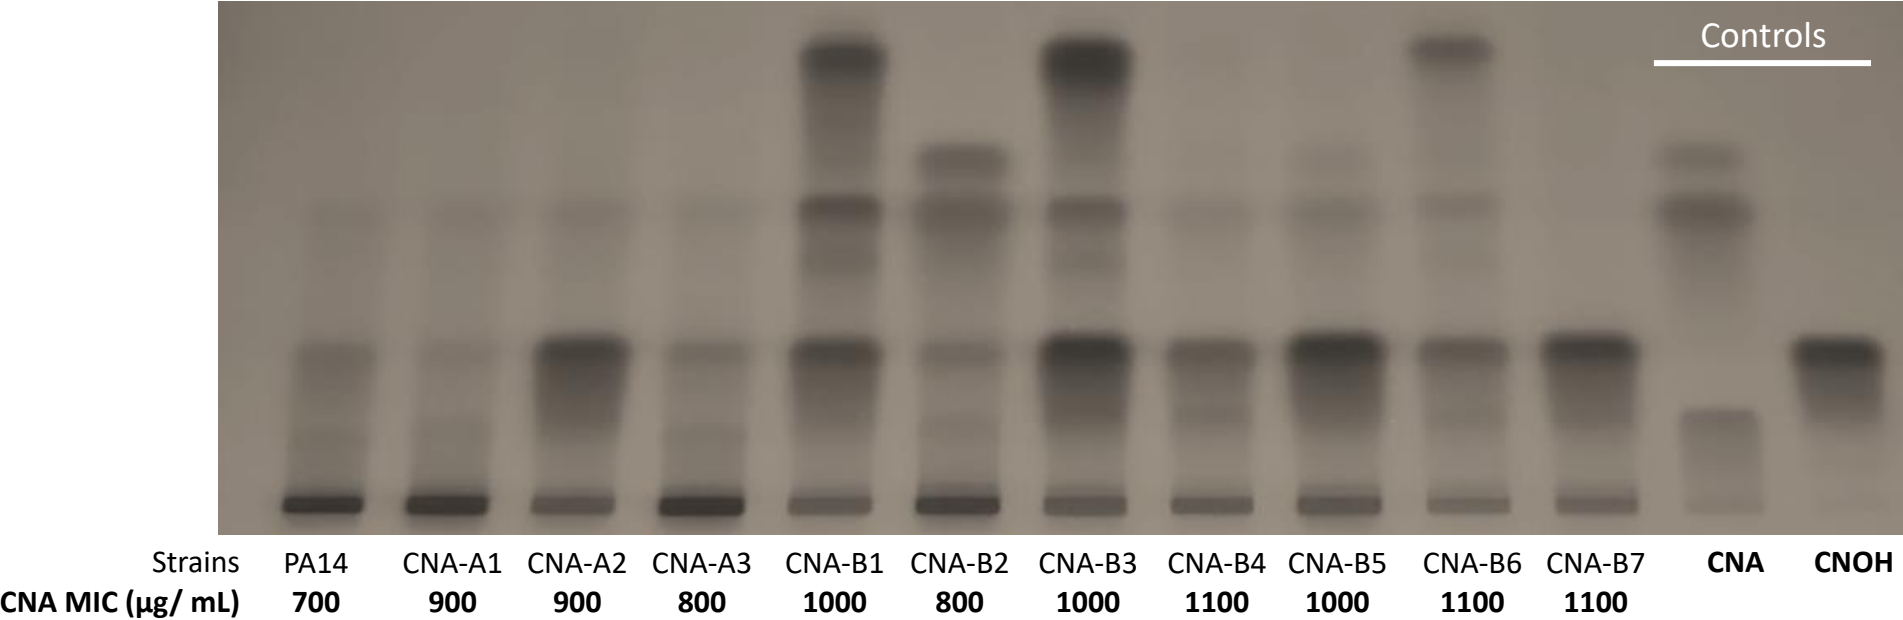

**Table S1. Susceptibility of CF strains P6-1 and P6-21 and their derivatives (-m1 to -m62) to antibiotics.**

|              | Inhibition zone around antibiotic (mm)* |           |           |           |           |           |           |           |           |           |           |           |
|--------------|-----------------------------------------|-----------|-----------|-----------|-----------|-----------|-----------|-----------|-----------|-----------|-----------|-----------|
|              | AKN                                     | GME       | TMN       | MEM       | IPM       | CAZ       | FEP       | CIP       | ATM       | PIR       | TIC       | COL       |
| <b>P6-1</b>  | <b>26</b>                               | <b>26</b> | <b>26</b> | <b>35</b> | <b>27</b> | <b>27</b> | <b>28</b> | <b>34</b> | <b>28</b> | <b>25</b> | <b>24</b> | <b>15</b> |
| P6-1-m1      | 25                                      | 27        | 26        | 34        | 28        | 28        | 27        | 34        | 29        | 24        | 25        | 15        |
| P6-1-m2      | 13                                      | 22        | 21        | 14        | 10        | 27        | 24        | 15        | 27        | 18        | 25        | 19        |
| P6-1-m3      | 23                                      | 27        | 26        | 35        | 26        | 30        | 26        | 35        | 27        | 24        | 23        | 14        |
| P6-1-m4      | 23                                      | 25        | 24        | 32        | 26        | 27        | 28        | 35        | 27        | 23        | 24        | 13        |
| P6-1-m5      | 25                                      | 27        | 25        | 35        | 27        | 30        | 28        | 36        | 29        | 24        | 23        | 15        |
| P6-1-m6      | 25                                      | 28        | 26        | 36        | 28        | 31        | 30        | 33        | 30        | 25        | 22        | 15        |
| <b>P6-21</b> | <b>16</b>                               | <b>20</b> | <b>21</b> | <b>15</b> | <b>11</b> | <b>22</b> | <b>19</b> | <b>17</b> | <b>22</b> | <b>11</b> | <b>20</b> | <b>19</b> |
| P6-21-m1     | 18                                      | 21        | 23        | 17        | 11        | 29        | 23        | 17        | 29        | 20        | 24        | 20        |
| P6-21-m2     | 18                                      | 23        | 24        | 20        | 12        | 32        | 26        | 18        | 32        | 24        | 27        | 20        |
| P6-21-m3     | 17                                      | 23        | 25        | 20        | 12        | 31        | 24        | 18        | 30        | 23        | 29        | 21        |
| P6-21-m4     | 17                                      | 23        | 24        | 16        | 11        | 27        | 22        | 17        | 30        | 18        | 28        | 20        |
| P6-21-m5     | 18                                      | 26        | 26        | 26        | 10        | 38        | 32        | 15        | 40        | 26        | 34        | 21        |
| P6-21-m6     | 20                                      | 25        | 26        | 15        | 10        | 30        | 24        | 15        | 31        | 20        | 26        | 20        |
| P6-21-m7     | 18                                      | 25        | 26        | 20        | 10        | 31        | 26        | 20        | 31        | 21        | 29        | 21        |
| P6-21-m8     | 16                                      | 22        | 23        | 20        | 15        | 31        | 28        | 18        | 17        | 24        | 34        | 19        |
| P6-21-m9     | 18                                      | 24        | 25        | 14        | 11        | 25        | 11        | 15        | 30        | 20        | 24        | 21        |
| P6-21-m10    | 27                                      | 24        | 24        | 20        | 11        | 30        | 28        | 18        | 30        | 20        | 27        | 21        |
| P6-21-m11    | 18                                      | 25        | 25        | 13        | 10        | 30        | 26        | 16        | 30        | 23        | 26        | 21        |
| P6-21-m12    | 12                                      | 25        | 26        | 12        | 9         | 30        | 23        | 13        | 29        | 23        | 24        | 19        |
| P6-21-m13    | 15                                      | 21        | 22        | 12        | 10        | 24        | 20        | 16        | 27        | 18        | 21        | 19        |
| P6-21-m14    | 18                                      | 22        | 22        | 12        | 10        | 23        | 20        | 16        | 21        | 11        | 19        | 19        |
| P6-21-m15    | 17                                      | 23        | 24        | 23        | 16        | 32        | 27        | 16        | 32        | 20        | 31        | 20        |
| P6-21-m16    | 16                                      | 23        | 22        | 19        | 15        | 27        | 23        | 16        | 30        | 11        | 30        | 19        |
| P6-21-m17    | 19                                      | 21        | 21        | 25        | 18        | 30        | 24        | 17        | 32        | 13        | 32        | 18        |
| P6-21-m18    | 17                                      | 21        | 23        | 12        | 10        | 22        | 20        | 17        | 24        | 12        | 21        | 19        |
| P6-21-m19    | 19                                      | 28        | 36        | 12        | 10        | 24        | 23        | 17        | 27        | 13        | 20        | 21        |
| P6-21-m20    | 16                                      | 23        | 23        | 14        | 10        | 27        | 20        | 19        | 28        | 16        | 24        | 20        |
| P6-21-m21    | 36                                      | 43        | 36        | 12        | 10        | 21        | 23        | 24        | 24        | 12        | 21        | 20        |
| P6-21-m22    | 36                                      | 40        | 35        | 9         | 9         | 11        | 18        | 26        | 20        | 6         | 13        | 20        |
| P6-21-m23    | 14                                      | 23        | 23        | 18        | 12        | 28        | 21        | 16        | 28        | 15        | 24        | 21        |
| P6-21-m24    | 19                                      | 25        | 25        | 10        | 10        | 26        | 22        | 15        | 30        | 19        | 24        | 21        |
| P6-21-m25    | 17                                      | 24        | 22        | 9         | 9         | 22        | 20        | 14        | 25        | 10        | 21        | 19        |
| P6-21-m26    | 13                                      | 18        | 18        | 17        | 10        | 23        | 20        | 14        | 27        | 13        | 23        | 18        |
| P6-21-m27    | 15                                      | 22        | 21        | 13        | 11        | 12        | 18        | 15        | 21        | 9         | 17        | 19        |
| P6-21-m28    | 15                                      | 22        | 22        | 25        | 10        | 31        | 24        | 17        | 32        | 14        | 27        | 20        |
| P6-21-m29    | 17                                      | 23        | 25        | 15        | 12        | 22        | 20        | 17        | 28        | 12        | 22        | 20        |
| P6-21-m30    | 15                                      | 21        | 21        | 16        | 11        | 21        | 20        | 17        | 24        | 10        | 20        | 19        |
| P6-21-m31    | 25                                      | 27        | 27        | 36        | 28        | 30        | 28        | 37        | 28        | 25        | 26        | 15        |
| P6-21-m32    | 27                                      | 28        | 26        | 36        | 27        | 30        | 30        | 36        | 30        | 25        | 26        | 15        |
| P6-21-m33    | 19                                      | 23        | 23        | 13        | 10        | 25        | 24        | 16        | 26        | 12        | 21        | 19        |
| P6-21-m34    | 15                                      | 20        | 20        | 17        | 10        | 27        | 21        | 18        | 21        | 17        | 25        | 19        |
| P6-21-m35    | 18                                      | 23        | 20        | 19        | 11        | 26        | 22        | 17        | 29        | 21        | 27        | 19        |
| P6-21-m36    | 15                                      | 21        | 20        | 28        | 11        | 26        | 24        | 16        | 25        | 15        | 22        | 20        |
| P6-21-m37    | 16                                      | 24        | 23        | 12        | 13        | 28        | 21        | 15        | 29        | 20        | 23        | 21        |
| P6-21-m38    | 25                                      | 28        | 27        | 36        | 29        | 32        | 28        | 37        | 29        | 26        | 26        | 16        |
| P6-21-m39    | 25                                      | 28        | 27        | 36        | 29        | 20        | 29        | 34        | 31        | 26        | 26        | 15        |
| P6-21-m40    | 24                                      | 28        | 27        | 36        | 28        | 31        | 28        | 36        | 31        | 26        | 25        | 15        |

|           |    |    |    |    |    |    |    |    |    |    |    |    |
|-----------|----|----|----|----|----|----|----|----|----|----|----|----|
| P6-21-m41 | 18 | 25 | 24 | 11 | 11 | 29 | 21 | 16 | 29 | 21 | 24 | 20 |
| P6-21-m42 | 26 | 39 | 33 | 10 | 11 | 23 | 25 | 22 | 24 | 12 | 19 | 20 |
| P6-21-m43 | 15 | 21 | 21 | 20 | 10 | 24 | 20 | 18 | 25 | 19 | 22 | 19 |
| P6-21-m44 | 18 | 23 | 24 | 21 | 11 | 32 | 24 | 20 | 32 | 19 | 26 | 19 |
| P6-21-m45 | 17 | 20 | 22 | 16 | 11 | 28 | 26 | 17 | 29 | 20 | 27 | 20 |
| P6-21-m46 | 16 | 21 | 21 | 14 | 10 | 26 | 21 | 16 | 30 | 20 | 25 | 21 |
| P6-21-m47 | 16 | 20 | 21 | 13 | 10 | 26 | 22 | 17 | 26 | 22 | 22 | 20 |
| P6-21-m48 | 22 | 22 | 22 | 19 | 11 | 26 | 24 | 16 | 30 | 16 | 25 | 21 |
| P6-21-m49 | 16 | 22 | 22 | 14 | 10 | 23 | 24 | 18 | 27 | 10 | 24 | 19 |
| P6-21-m50 | 16 | 21 | 21 | 20 | 12 | 26 | 23 | 18 | 27 | 17 | 22 | 19 |
| P6-21-m51 | 17 | 22 | 21 | 22 | 15 | 32 | 24 | 28 | 32 | 26 | 26 | 19 |
| P6-21-m52 | 16 | 21 | 21 | 18 | 11 | 24 | 21 | 18 | 25 | 12 | 22 | 19 |
| P6-21-m53 | 18 | 22 | 22 | 18 | 10 | 24 | 26 | 27 | 28 | 15 | 25 | 19 |
| P6-21-m54 | 17 | 21 | 22 | 16 | 10 | 22 | 20 | 20 | 24 | 10 | 20 | 18 |
| P6-21-m55 | 34 | 39 | 32 | 13 | 10 | 19 | 20 | 21 | 23 | 9  | 19 | 21 |
| P6-21-m56 | 17 | 40 | 35 | 10 | 9  | 19 | 22 | 20 | 24 | 8  | 19 | 19 |
| P6-21-m57 | 34 | 44 | 37 | 14 | 10 | 27 | 28 | 24 | 28 | 10 | 24 | 19 |
| P6-21-m58 | 18 | 25 | 25 | 16 | 9  | 28 | 24 | 15 | 28 | 13 | 20 | 18 |
| P6-21-m59 | 19 | 23 | 22 | 12 | 10 | 23 | 20 | 15 | 27 | 10 | 20 | 18 |
| P6-21-m60 | 15 | 20 | 19 | 15 | 11 | 23 | 26 | 18 | 24 | 6  | 25 | 20 |
| P6-21-m61 | 16 | 23 | 21 | 23 | 12 | 27 | 26 | 15 | 29 | 8  | 27 | 18 |
| P6-21-m62 | 18 | 24 | 24 | 15 | 9  | 30 | 24 | 13 | 31 | 13 | 27 | 19 |

AKN amikacin, GME gentamicin, TMN tobramycin, MEM meropenem, IPM imipenem, CAZ ceftazidime, FEP cefepim, CIP ciprofloxacin, ATM aztreonam, PIR piperacillin, TIC ticarcillin, COL colistin. In green or in red, increase or decrease of inhibition zone > or < 2mm, respectively.

**Table S2. Strains and plasmids used in the study.**

| Stains                     | Description                                                                                                                 | References |
|----------------------------|-----------------------------------------------------------------------------------------------------------------------------|------------|
| <i>P. aeruginosa</i>       |                                                                                                                             |            |
| <u>Reference strain</u>    |                                                                                                                             |            |
| PA14                       | Wild type reference strain, susceptible to antibiotics                                                                      | [3]        |
| PA14Δ <i>mexAB</i>         | PA14-derived <i>mexAB</i> deleted mutant                                                                                    | [4]        |
| PA14 <i>mexAB</i> +        | Spontaneous MexAB-OprM overproducing mutant <i>nalB</i> from PA14, exhibiting a 3-bp deletion in repressor gene <i>mexR</i> | [4]        |
| PA14Δ <i>fliE</i>          | PA14-derived <i>fliE</i> deleted mutant                                                                                     | This study |
| PA14 <i>mutS</i> ::MAR2xT7 | PA14-derived <i>mutS</i> transposon insertion mutant                                                                        | [3]        |
| PA14 <i>mutL</i> ::MAR2xT7 | PA14-derived <i>mutL</i> transposon insertion mutant                                                                        | [3]        |
| <u>Mutants CNA-R</u>       |                                                                                                                             |            |
| CNA-A1, A2, A3             | PA14-derived CNA-R mutants obtained by method A after 10 days                                                               | This study |
| CNA-B1, B2, B3             | PA14-derived CNA-R mutants obtained by method B after 5 days                                                                | This study |
| CNA-B4, B5, B6, B7         | PA14-derived CNA-R mutants obtained by method B after 10 days                                                               | This study |
| B1ΔAB                      | CNA-B1 with deletion of <i>mexAB</i> genes                                                                                  | This study |
| B3ΔAB                      | CNA-B3 with deletion of <i>mexAB</i> genes                                                                                  | This study |
| B4ΔAB                      | CNA-B4 with deletion of <i>mexAB</i> genes                                                                                  | This study |
| B5ΔAB                      | CNA-B5 with deletion of <i>mexAB</i> genes                                                                                  | This study |
| B6ΔAB                      | CNA-B6 with deletion of <i>mexAB</i> genes                                                                                  | This study |
| B7ΔAB                      | CNA-B7 with deletion of <i>mexAB</i> genes                                                                                  | This study |

Clinical CF-strains

|       |                                                                        |            |
|-------|------------------------------------------------------------------------|------------|
| P6-1  | Primo-colonization isolate from patient P6                             | This study |
| P6-14 | Mid-colonization isolate from patient P6 (L <sub>255</sub> Q in MutS)  | This study |
| P6-21 | Late-colonization isolate from patient P6 (L <sub>255</sub> Q in MutS) | This study |

***E. coli***

|                                 |                                                                                                                                    |            |
|---------------------------------|------------------------------------------------------------------------------------------------------------------------------------|------------|
| DH5α                            | <i>F- φ80lacZΔM15 Δ(lacZYA-argF) U169 recA1 endA1 hsdR17(rk, mk+) phoA supE44 thi-1 gyrA96 relA1 λ-</i>                            | Invitrogen |
| CC118λ <sub>pir</sub>           | CC118 lysogenic for phage λ <sub>pir</sub>                                                                                         | [5]        |
| HB101                           | <i>subE44 subF58 hsdS3(r<sub>B</sub><sup>-</sup> m<sub>B</sub><sup>-</sup>) recA13 ara-14 proA2 lacY1 galK2 rpsL20 xyl-5 mtl-1</i> | [6]        |
| HB101(pRK2013)                  | Strain HB101 containing helper plasmid pRK2013 for conjugation ( <i>mob1, tra1, colE1, Kan<sup>R</sup></i> )                       | [7]        |
| CC118λ <sub>pir</sub> (pKNG101) | Strain CC118λ <sub>pir</sub> containing suicide vector pKNG101 ( <i>oriR6K, sacB, Str<sup>R</sup></i> )                            | [8]        |

Kan<sup>R</sup>, Str<sup>R</sup>: selective plasmid markers conferring resistance to kanamycin and streptomycin, respectively.

**Table S3: Primers used for gene inactivation and RT-qPCR experiments.**

| Primer                   | Sequence (5' → 3')          | T <sub>m</sub> (°C) | References |
|--------------------------|-----------------------------|---------------------|------------|
| <b>Gene inactivation</b> |                             |                     |            |
| <i>ifliE_2</i>           | CGCGAATTCCAGGTGATCAT        | 60                  | This study |
| <i>ifliE_2</i>           | GCGCCGCGGAGAGCATTTCCGAAAAGC | 60                  | This study |
| <i>ifliE_3</i>           | GCTCTCCGCGGCGCGAGGATAACTA   | 60                  | This study |
| <i>ifliE_4</i>           | GTTGTTTCAGGCTCGACACG        | 60                  | This study |
| <b>RT-qPCR</b>           |                             |                     |            |
| <i>armR-F</i>            | CAACAAACCGTCCCGCACCGA       | 60                  | [4]        |
| <i>armR-R</i>            | TCAGTAGAAGTGCTCGCCGTAGAGG   | 60                  |            |
| <i>mexB1</i>             | ATCCGCCAGACCATCGCCA         | 60                  | [9]        |
| <i>mexB2</i>             | CATCACCAGGAACACGAGGAGG      | 60                  |            |
| <i>mexY1A</i>            | TTACCTCCTCCAGCGGC           | 60                  | [10]       |
| <i>mexY1B</i>            | GTGAGGCGCGCGTTGTG           | 60                  |            |
| <i>mexC1</i>             | TGCGGATTTACCCAGACC          | 60                  | [11]       |
| <i>mexC2</i>             | GGCCAAGGTGCCTTTCTTCA        | 60                  |            |
| <i>mexE4</i>             | CCAGGACCAGCACGAACT          | 60                  | [11]       |
| <i>mexE5</i>             | CGACAACGCCAAGGGCGAGTTCACC   | 60                  |            |
| <i>rpsL3</i>             | GCAACTATCAACCAGCTGGTG       | 60                  | [11]       |
| <i>rpsL5</i>             | GCTGTGCTCTTGACAGGTGTG       | 60                  |            |



Table S4: 18 mutations found in mutant CNA-B1

| PA number                                   | Ortholog (PAO1) | Name   | Mutation | Probable function                                                                                                                                                             |
|---------------------------------------------|-----------------|--------|----------|-------------------------------------------------------------------------------------------------------------------------------------------------------------------------------|
| Transport                                   |                 |        |          |                                                                                                                                                                               |
| PA14_0167                                   | PA0136          |        | D467G    | probable ATP-binding component of ABC transporter<br>TonB-dependent receptor protein<br>periplasmic histidine-binding protein HisJ<br>dipeptide ABC transporter permease DppB |
| PA14_0241                                   | PA0192          |        | S673G    |                                                                                                                                                                               |
| PA14_2624                                   | PA2923          | hisJ   | A9T      |                                                                                                                                                                               |
| PA14_5844                                   | PA4503          | dppB   | G114D    |                                                                                                                                                                               |
| DNA replication/repair                      |                 |        |          |                                                                                                                                                                               |
| PA14_0005                                   | PA0004          | gyrB   | O519R    | DNA gyrase, B subunit                                                                                                                                                         |
| PA14_1750                                   | PA3620          | mutS   | indel    | DNA mismatch repair protein MutS                                                                                                                                              |
| Transcription or transcriptional regulation |                 |        |          |                                                                                                                                                                               |
| PA14_1628                                   | PA3721          | nalC   | indel    | transcriptional regulator NalC                                                                                                                                                |
| PA14_3236                                   | PA2497          |        | indel    | LysR family transcriptional regulator                                                                                                                                         |
| PA14_3473                                   | PA2312          |        | G123D    | XRE family transcriptional regulator                                                                                                                                          |
| PA14_6939                                   | PA5255          | alcO   | Indel    | anti-RNA polymerase sigma 70 factor                                                                                                                                           |
| Energy and metabolism                       |                 |        |          |                                                                                                                                                                               |
| PA14_3882                                   | PA1986          | pqqB   | H246R    | pyrroloquinoline quinone biosynthesis protein PqqB                                                                                                                            |
| PA14_5221                                   | PA0932          | cysM   | T27A     | cysteine synthase B                                                                                                                                                           |
| Cell wall integrity                         |                 |        |          |                                                                                                                                                                               |
| PA14_2058                                   | PA3364          | amiC   | T233A    | aliphatic amidase expression-regulating protein                                                                                                                               |
| PA14_6610                                   | PA4999          | waaL   | W282R    | Hypothetical protein / O-antigen ligase, WaaL                                                                                                                                 |
| Chemotaxis / stress response                |                 |        |          |                                                                                                                                                                               |
| PA14_2976                                   | PA2652/5        | (tlpO) | L561P    | chemotaxis transducer                                                                                                                                                         |
| PA14_0372                                   | PA0285          |        | V525A    | hypothetical protein (sensory box GGDEF domain-                                                                                                                               |
| Conjugational transfer                      |                 |        |          |                                                                                                                                                                               |
| PA14_1554                                   | No              | trbL   | indel    | mating pair formation protein TrbL                                                                                                                                            |
| Unknown function                            |                 |        |          |                                                                                                                                                                               |
| PA14_1758                                   | PA3613          |        | R661H    | hypothetical protein                                                                                                                                                          |

In bold, inactivating mutations.

Table S5: 16 mutations found in mutant CNA-B2

| PA number                                          | Ortholog      | Name        | Mutation     | Probable function                                   |
|----------------------------------------------------|---------------|-------------|--------------|-----------------------------------------------------|
| <b>Transport</b>                                   |               |             |              |                                                     |
| <b>PA14_0290</b>                                   | <b>PA0235</b> | <i>ncaK</i> | <b>indel</b> | 4-hydroxybenzoate transporter                       |
| <b>DNA replication/repair</b>                      |               |             |              |                                                     |
| PA14_1750                                          | PA3620        | <i>mutS</i> | Q589R        | DNA mismatch repair protein MutS                    |
| PA14_5567                                          | PA4284        | <i>recB</i> | N1172S       | exodeoxyribonuclease V, beta subunit                |
| PA14_6301                                          | PA4763        | <i>recN</i> | T451A        | DNA repair protein RecN                             |
| <b>Transcription or transcriptional regulation</b> |               |             |              |                                                     |
| PA14_0837                                          | PA0652        | <i>vfr</i>  | Y65G         | cAMP-regulatory protein / transcriptional regulator |
| PA14_1406                                          | PA3860        |             | P396L        | AMP-binding protein                                 |
| PA14_5274                                          | PA0893        | <i>argR</i> | P292S        | transcriptional regulator ArgR                      |
| <b>Translational machineries</b>                   |               |             |              |                                                     |
| PA14_0875                                          | PA4271        | <i>rplL</i> | T78A         | 50S ribosomal protein L7/L12                        |
| <b>Energy and metabolism</b>                       |               |             |              |                                                     |
| <b>PA14_1936</b>                                   | <b>PA3460</b> |             | <b>indel</b> | GNAT family acetyltransferase                       |
| PA14_4064                                          | PA1846        | <i>cti</i>  | W441R        | cis/trans isomerase                                 |
| <b>Virulence factors</b>                           |               |             |              |                                                     |
| PA14_1625                                          | PA3725        | <i>lasB</i> | D365G        | elastase LasB                                       |
| PA14_3279                                          | PA0041        |             | T3644A       | hypothetical protein (probable hemagglutinin)       |
| PA14_5043                                          | PA1082        | <i>flgG</i> | P83L         | flagellar basal body rod protein FlgG               |
| <b>Chemotaxis / stress response</b>                |               |             |              |                                                     |
| PA14_1934                                          | PA3462        |             | G189R        | probable sensor/response regulator hybrid           |
| <b>Unknown function</b>                            |               |             |              |                                                     |
| <b>PA14_3293</b>                                   | <b>PA2450</b> |             | <b>V21*</b>  | hypothetical protein                                |
| PA14_5662                                          | PA4354        |             | D4G          | hypothetical protein                                |
| PA14_6059                                          | PA4580        |             | A68V         | hypothetical protein                                |

In bold, inactivating mutations

Table S6: 26 mutations found in mutant CNA-B3

| PA number (PA14)                                   | Ortholog (PAO1) | Name            | Mutation     | Probable function                              |
|----------------------------------------------------|-----------------|-----------------|--------------|------------------------------------------------|
| <b>Transport</b>                                   |                 |                 |              |                                                |
| PA14 30600                                         | PA2589          |                 | A300V        | permease                                       |
| PA14 58440                                         | PA4503          | <i>dppB</i>     | G114D        | dipeptide ABC transporter permease DppB        |
| <b>DNA replication/repair</b>                      |                 |                 |              |                                                |
| <b>PA14 17500</b>                                  | <b>PA3620</b>   | <i>mutS</i>     | <b>indel</b> | DNA mismatch repair protein MutS               |
| PA14 39300                                         | PA1949          | <i>rbsR</i>     | V320M        | ribose operon repressor RbsR                   |
| PA14 55610                                         | PA0669          | <i>dnaE2</i>    | G793S        | error-prone DNA polymerase                     |
| <b>Transcription or transcriptional regulation</b> |                 |                 |              |                                                |
| <b>PA14 16280</b>                                  | <b>PA3721</b>   | <i>nalC</i>     | <b>Indel</b> | transcriptional regulator NalC                 |
| <b>PA14 49680</b>                                  | <b>PA1138</b>   |                 | <b>Indel</b> | transcriptional regulator                      |
| PA14 11180                                         | PA4074          |                 | O259R        | probable transcriptional regulator             |
| <b>Energy and metabolism</b>                       |                 |                 |              |                                                |
| PA14 02830                                         | PA0230          | <i>ncaB</i>     | E239G        | 3-carboxy-cis, cis-muconate cycloisomerase     |
| PA14 15030                                         | PA3792          | <i>leuA</i>     | I464T        | 2-isopropylmalate synthase                     |
| PA14 37370                                         | PA2098          |                 | A292V        | esterase / deacetylase                         |
| PA14 73260                                         | PA5556          | <i>atpA</i>     | D290G        | F0F1 ATP synthase, alpha subunit               |
| <b>Virulence factors</b>                           |                 |                 |              |                                                |
| PA14 24490                                         | PA3063          | <i>pelB</i>     | S550G        | hypothetical protein (pel operon)              |
| <b>PA14 50160</b>                                  | <b>PA1100</b>   | <i>fliE</i>     | <b>Q54*</b>  | flagellar hook-basal body protein FliE         |
| PA14 58570                                         | 6               |                 | T735A        | outer membrane ferric siderophore receptor     |
| PA14 62350                                         | PA4710          | <i>phuR</i>     | Y295C        | heme/hemoglobin uptake outer membrane receptor |
| <b>Chemotaxis / stress response</b>                |                 |                 |              |                                                |
| PA14 28910                                         | PA2726          |                 | F25L         | radical activating enzyme                      |
| PA14 29760                                         | PA2652/5        | ( <i>tlpO</i> ) | L561P        | chemotaxis transducer                          |
| PA14 11340                                         | PA4061          | <i>ubbN</i>     | F86S         | thioredoxin                                    |
| <b>Unknown function</b>                            |                 |                 |              |                                                |
| PA14 21580                                         | PA3283          |                 | N142S        | hypothetical protein                           |
| <b>PA14 41930</b>                                  | <b>PA1749</b>   |                 | <b>indel</b> | <b>hypothetical protein</b>                    |
| PA14 46140                                         | PA1416          |                 | V208A        | hypothetical protein                           |
| <b>PA14 47120</b>                                  | <b>PA1324</b>   |                 | <b>Indel</b> | <b>hypothetical protein</b>                    |
| PA14 53390                                         | PA0841          |                 | A304V        | hypothetical protein                           |
| <b>PA14 57470</b>                                  | <b>PA4422</b>   |                 | <b>Indel</b> | <b>hypothetical protein</b>                    |
| PA14 58070                                         | PA4474          |                 | Y365C        | hypothetical protein                           |

In bold, inactivating mutations

Table S7: 35 mutations found in mutant CNA-B4

| PA number                                          | Ortholog (PAO1) | Name               | Mutation     | Probable function                                     |
|----------------------------------------------------|-----------------|--------------------|--------------|-------------------------------------------------------|
| <b>Transport</b>                                   |                 |                    |              |                                                       |
| PA14_3341                                          | PA2420          |                    | V290         | Porin                                                 |
| PA14_5844                                          | PA4503          | <i>dppB</i>        | G114         | dipeptide ABC transporter permease DppB               |
| PA14_6640                                          | PA5022          | <i>kefA</i>        | F722L        | potassium efflux protein KefA                         |
| <b>DNA replication/repair</b>                      |                 |                    |              |                                                       |
| <b>PA14_1750</b>                                   | <b>PA3620</b>   | <b><i>mutS</i></b> | <b>indel</b> | DNA mismatch repair protein MutS                      |
| PA14_2648                                          | PA2907          | <i>cobL</i>        | S110P        | precorrin-6v-dependent methyltransferase CobL         |
| PA14_3930                                          | PA1949          | <i>rbsR</i>        | V320         | ribose operon repressor RbsR                          |
| PA14_6838                                          | PA5176          | <i>nudE</i>        | Y45C         | ADP-ribose diphosphatase NudE                         |
| <b>Transcription or transcriptional regulation</b> |                 |                    |              |                                                       |
| PA14_0878                                          | PA4269          | <i>rpoC</i>        | K1172        | DNA-directed RNA polymerase, beta*chain subunit       |
| <b>PA14_1628</b>                                   | <b>PA3721</b>   | <b><i>nalC</i></b> | <b>indel</b> | transcriptional regulator NalC                        |
| <b>PA14_2170</b>                                   | <b>PA3271</b>   |                    | <b>W107</b>  | two-component sensor                                  |
| <b>PA14_2370</b>                                   | <b>PA3124</b>   |                    | <b>indel</b> | LysR family transcriptional regulator                 |
| <b>PA14_4681</b>                                   | <b>PA1351</b>   |                    | <b>indel</b> | RNA polymerase ECF-subfamily sigma-70 factor          |
| <b>Translational machineries</b>                   |                 |                    |              |                                                       |
| PA14_1235                                          | PA3280          | <i>uleA/mi</i>     | G200         | (dimethylallyl)adenosine tRNA methylthiotransferase   |
| <b>Energy and metabolism</b>                       |                 |                    |              |                                                       |
| PA14_0758                                          | PA0581          | <i>usiH</i>        | V120         | glycerol-3-phosphate acyltransferase PlsY             |
| PA14_2250                                          | No              |                    | F87L         | protein-disulfide isomerase                           |
| PA14_2486                                          | PA3032          | <i>snr1</i>        | D28G         | cytochrome c Snr1                                     |
| PA14_3348                                          | PA2414          | <i>sndH</i>        | V117         | L-sorbose dehydrogenase                               |
| PA14_3420                                          | PA2355          |                    | N384         | FMN/H <sub>2</sub> -dependent monooxygenase           |
| PA14_7330                                          | PA5559          | <i>atpE</i>        | T23A         | F <sub>0</sub> F <sub>1</sub> ATP synthase, C subunit |
| <b>Cell wall integrity</b>                         |                 |                    |              |                                                       |
| PA14_4800                                          | 3 orthologs     |                    | G278         | dihydrodipicolinate synthetase                        |
| <b>Virulence factors</b>                           |                 |                    |              |                                                       |
| PA14_0536                                          | PA0411          | <i>vilI</i>        | T403         | twitching motility protein                            |
| PA14_1014                                          | PA4161          | <i>feoG</i>        | S177         | ferric enterobactin transport protein                 |
| <b>PA14_3363</b>                                   | <b>PA2400</b>   | <b><i>pvdI</i></b> | <b>indel</b> | protein PvdI synthesis (unknown function)             |
| PA14_5038                                          | PA1085          | <i>flaI</i>        | O341         | flagellar rod assembly protein/muramidase FlaI        |
| <b>Chemotaxis / stress response</b>                |                 |                    |              |                                                       |
| PA14_2976                                          | PA2652/54       | <i>(tlpO)</i>      | L561P        | chemotaxis transducer                                 |
| <b>PA14_4222</b>                                   | <b>PA1727</b>   | <b><i>mucR</i></b> | <b>indel</b> | membrane sensor domain-containing protein             |
| PA14_1134                                          | PA4061          | <i>ubbN</i>        | F86S         | thioredoxin                                           |
| <b>Unknown function</b>                            |                 |                    |              |                                                       |
| <b>PA14_0206</b>                                   | <b>PA0165</b>   |                    | <b>indel</b> | hypothetical protein                                  |
| PA14_0470                                          | PA0360          |                    | H297         | hypothetical protein                                  |
| PA14_3080                                          | PA2575          |                    | L6P          | hypothetical protein                                  |
| PA14_5538                                          | 5 orthologs     |                    | G170         | hypothetical protein                                  |
| PA14_6225                                          | PA4703          |                    | L61P         | hypothetical protein                                  |
| PA14_6329                                          | PA4788          | <i>phaI3</i>       | L156P        | hypothetical protein                                  |
| PA14_6646                                          | PA5027          |                    | L93S         | hypothetical protein                                  |
| PA14_7058                                          | PA5346          | <i>sadB</i>        | T220         | hypothetical protein                                  |

In bold, inactivating mutations

Table S8: 24 Mutations found in mutant CNA-B5

| PA number (PA14)                                   | Ortholog (PAO1) | Name            | Mutation | Probable function                                   |
|----------------------------------------------------|-----------------|-----------------|----------|-----------------------------------------------------|
| <b>Transport</b>                                   |                 |                 |          |                                                     |
| PA14_3060                                          | PA2589          |                 | A300V    | permease                                            |
| PA14_5840                                          | PA4503          | <i>dppB</i>     | G114D    | dipeptide ABC transporter permease DppB             |
| <b>DNA replication/repair</b>                      |                 |                 |          |                                                     |
| PA14_1750                                          | PA3620          | <i>mutS</i>     | indel    | DNA mismatch repair protein MutS                    |
| PA14_3930                                          | PA1949          | <i>rbsR</i>     | V320M    | ribose operon repressor RbsR (purines synthesis)    |
| <b>Transcription or transcriptional regulation</b> |                 |                 |          |                                                     |
| PA14_6863                                          | PA5195          |                 | Q119R    | heat shock protein                                  |
| PA14_1628                                          | PA3721          | <i>nalC</i>     | indel    | transcriptional regulator NalC                      |
| <b>Translational machineries</b>                   |                 |                 |          |                                                     |
| PA14_0882                                          | PA4266          | <i>fusA1</i>    | A225T    | elongation factor G                                 |
| <b>Energy and metabolism</b>                       |                 |                 |          |                                                     |
| PA14_0283                                          | PA0230          | <i>pcaB</i>     | E239G    | 3-carboxy-cis, cis-muconate cycloisomerase          |
| PA14_1503                                          | PA3792          | <i>leuA</i>     | I464T    | 2-isopropylmalate synthase                          |
| PA14_6355                                          | PA4809          | <i>fdhE</i>     | T255A    | formate dehydrogenase accessory protein FdhE        |
| PA14_7326                                          | PA5556          | <i>atpA</i>     | D290G    | F0F1 ATP synthase, alpha subunit                    |
| <b>Cell wall integrity</b>                         |                 |                 |          |                                                     |
| PA14_7304                                          | PA5538          | <i>amiA</i>     | R62W     | N-acetylmuramoyl-L-alanine amidase                  |
| <b>Virulence factors</b>                           |                 |                 |          |                                                     |
| PA14_2449                                          | PA3063          | <i>pelB</i>     | S550G    | hypothetical protein (operon pel)                   |
| PA14_5016                                          | PA1100          | <i>fliE</i>     | Q54*     | flagellar hook-basal body protein FliE              |
| PA14_6235                                          | PA4710          | <i>phuR</i>     | Y295C    | heme/hemoglobin uptake outer membrane receptor PhuR |
| <b>Chemotaxis / stress response</b>                |                 |                 |          |                                                     |
| PA14_2976                                          | PA2652/54       | ( <i>tlpQ</i> ) | L561P    | chemotaxis transducer                               |
| PA14_1134                                          | PA4061          | <i>ybbN</i>     | F86S     | thioredoxin                                         |
| <b>Unknown function</b>                            |                 |                 |          |                                                     |
| PA14_2158                                          | PA3283          |                 | N142S    | Hypothetical protein                                |

|                        |               |  |              |                      |
|------------------------|---------------|--|--------------|----------------------|
| PA14_2756<br>0         | PA2823        |  | R271C        | hypothetical protein |
| PA14_4614<br>0         | PA1416        |  | V208A        | hypothetical protein |
| PA14_5339<br>0         | PA0841        |  | A304V        | hypothetical protein |
| <b>PA14_5747<br/>0</b> | <b>PA4422</b> |  | <b>Indel</b> | hypothetical protein |
| PA14_5768<br>0         | PA4440        |  | V146A        | hypothetical protein |
| PA14_5807<br>0         | PA4474        |  | Y365C        | hypothetical protein |

**In bold**, inactivating mutations

**Table S9: 35 mutations found in mutant CNA-B6**

| PA number                                   | Ortholog (PAO1) | Name        | Mutation | Probable function                                                                                                                                                                                                                           |
|---------------------------------------------|-----------------|-------------|----------|---------------------------------------------------------------------------------------------------------------------------------------------------------------------------------------------------------------------------------------------|
| Transport                                   |                 |             |          |                                                                                                                                                                                                                                             |
| PA14_1020                                   | PA4156          | <i>fbpA</i> | T59A     | TonB-dependent receptor protein transporter<br>dipeptide ABC transporter permease DppB<br>potassium efflux protein KefA<br>ABC transporter ATP-binding protein                                                                              |
| PA14_4506                                   | PA1497          |             | G253S    |                                                                                                                                                                                                                                             |
| PA14_5844                                   | PA4503          | <i>dppB</i> | G114D    |                                                                                                                                                                                                                                             |
| PA14_6640                                   | PA5022          | <i>kefA</i> | F722L    |                                                                                                                                                                                                                                             |
| PA14_6806                                   | PA5152          |             | H256R    |                                                                                                                                                                                                                                             |
| DNA replication/repair                      |                 |             |          |                                                                                                                                                                                                                                             |
| PA14_1531                                   | PA3770          | <i>guaB</i> | P154S    | inosine 5'-monophosphate dehydrogenase<br>DNA mismatch repair protein MutS<br>ribose operon repressor RbsR<br>integrase<br>ADP-ribose diphosphatase NudE<br>DNA polymerase I                                                                |
| PA14_1750                                   | PA3620          | <i>mutS</i> | indel    |                                                                                                                                                                                                                                             |
| PA14_3930                                   | PA1949          | <i>rbsR</i> | V320M    |                                                                                                                                                                                                                                             |
| PA14_5165                                   | No ortholog     |             | Indel    |                                                                                                                                                                                                                                             |
| PA14_6838                                   | PA5176          | <i>nudE</i> | Y45C     |                                                                                                                                                                                                                                             |
| PA14_7249                                   | PA5493          | <i>polA</i> | P609L    |                                                                                                                                                                                                                                             |
| Transcription or transcriptional regulation |                 |             |          |                                                                                                                                                                                                                                             |
| PA14_0878                                   | PA4269          | <i>rpoC</i> | K1172E   | DNA-directed RNA polymerase, beta*chain subunit<br>transcriptional regulator NalC<br>LysR family transcriptional regulator                                                                                                                  |
| PA14_1628                                   | PA3721          | <i>nalC</i> | indel    |                                                                                                                                                                                                                                             |
| PA14_1638                                   | PA3711          |             | V272A    |                                                                                                                                                                                                                                             |
| Translational machineries                   |                 |             |          |                                                                                                                                                                                                                                             |
| PA14-00180                                  | PA0017          |             | A253V    | hypothetical protein (tRNA and rRNA cytosine C5-methylases)                                                                                                                                                                                 |
| Energy and metabolism                       |                 |             |          |                                                                                                                                                                                                                                             |
| PA14_1026                                   | PA4150          |             | A219T    | dehydrogenase E1 component<br>short chain dehydrogenase / NADPH-dependant carbonyl reductase<br>thiamine pyrophosphate protein<br>glycosyl transferase family protein – 1,2-glucosyltransferase WapB<br>glycosyl transferase family protein |
| PA14_1113                                   | PA4079          |             | V4A      |                                                                                                                                                                                                                                             |
| PA14_3820                                   | PA2035          |             | V442A    |                                                                                                                                                                                                                                             |
| PA14_5122                                   | 6 orthologs     | <i>wapB</i> | Y192C    |                                                                                                                                                                                                                                             |
| PA14_5338                                   | PA0842          |             | G399E    |                                                                                                                                                                                                                                             |
| Cell wall integrity                         |                 |             |          |                                                                                                                                                                                                                                             |

|                                     |               |                 |               |                                                |
|-------------------------------------|---------------|-----------------|---------------|------------------------------------------------|
| PA14_56450                          | 3 orthologs   |                 | P229L         | amidase                                        |
| <b>Virulence factors</b>            |               |                 |               |                                                |
| PA14_05360                          | PA0411        | <i>pilJ</i>     | T403A         | twitching motility protein                     |
| PA14_42660                          | PA1690        | <i>pscU</i>     | N263S         | translocation protein in type III secretion    |
| PA14_50380                          | PA1085        | <i>flgJ</i>     | Q341R         | flagellar rod assembly protein/muramidase FlgJ |
| <b>Chemotaxis / stress response</b> |               |                 |               |                                                |
| <b>PA14_21700</b>                   | <b>PA3271</b> | <i>mxtR</i>     | <b>W1071*</b> | two-component sensor                           |
| PA14_29760                          | PA2652/54     | ( <i>tlpQ</i> ) | L561P         | chemotaxis transducer                          |
| PA14_11340                          | PA4061        | <i>ybbN</i>     | F86S          | thioredoxin                                    |
| <b>Unknown function</b>             |               |                 |               |                                                |
| <b>PA14_00990</b>                   | <b>PA0082</b> | <i>tssA1</i>    | <b>indel</b>  | hypothetical protein                           |
| <b>PA14_02060</b>                   | <b>PA0165</b> |                 | <b>Indel</b>  | hypothetical protein                           |
| PA14_27350                          | PA2842        |                 | L136P         | hypothetical protein                           |
| PA14_55380                          | 5 orthologs   |                 | G170D         | hypothetical protein                           |
| PA14_57650                          | PA4438        |                 | T256A         | hypothetical protein                           |
| PA14_60070                          | PA1939        |                 | S85P          | hypothetical protein                           |
| PA14_62250                          | PA4703        |                 | L61P          | hypothetical protein                           |
| <b>PA14_73140</b>                   | <b>PA5546</b> | <i>dppB</i>     | <b>Indel</b>  | hypothetical protein (conserved)               |

**In bold**, inactivating mutations



Table S10: 39 mutations found in mutant CNA-B7

| PA number<br>(PA14)                                | Ortholog<br>(PA01) | Name                    | Mutation     | Probable function                                                                              |
|----------------------------------------------------|--------------------|-------------------------|--------------|------------------------------------------------------------------------------------------------|
| <b>Transport</b>                                   |                    |                         |              |                                                                                                |
| PA14_06340                                         | PA0487             | <i>modR/modE</i>        | I171T        | probable molybdenum transport regulator                                                        |
| PA14_13170                                         | PA3920             | <i>copA1</i>            | E150G        | metal transporting P-type ATPase                                                               |
| PA14_15475                                         | No                 | <i>merT</i>             | L101P        | mercuric transport protein MerT                                                                |
| PA14_18275                                         | PA3560             | <i>fruA</i>             | K236R        | phosphotransferase system, transporter fructose-specific                                       |
| PA14_21620                                         | PA3279             | <i>oprP</i>             | V288A        | phosphate-specific outer membrane porin OprP                                                   |
| <b>PA14_50550</b>                                  | <b>PA1071</b>      | <b><i>livG/braF</i></b> | <b>Indel</b> | leucine/isoleucine/valine transporter ATP-binding                                              |
| PA14_58440                                         | PA4503             | <i>dppB</i>             | G114D        | subunit/branched-chain amino acid transport protein<br>dipeptide ABC transporter permease DppB |
| <b>DNA replication/repair</b>                      |                    |                         |              |                                                                                                |
| PA14_00010                                         | PA0001             | <i>dnaA</i>             | A338V        | chromosomal replication initiator protein                                                      |
| <b>PA14_17500</b>                                  | <b>PA3620</b>      | <b><i>mutS</i></b>      | <b>Indel</b> | DNA mismatch repair protein MutS                                                               |
| PA14_39300                                         | PA1949             | <i>rbsR</i>             | V320M        | ribose operon repressor RbsR                                                                   |
| <b>Translational machineries</b>                   |                    |                         |              |                                                                                                |
| PA14_70420                                         | PA5334             | <i>rph</i>              | T71I         | ribonuclease PH                                                                                |
| <b>Energy and metabolism</b>                       |                    |                         |              |                                                                                                |
| PA14_02830                                         | PA0230             | <i>pcaB</i>             | E239G        | 3-carboxy-cis, cis-muconate cycloisomerase                                                     |
| PA14_35270                                         | PA2266             |                         | V338A        | cytochrome c precursor                                                                         |
| PA14_35880                                         | No                 |                         | P321L        | gamma-aminobutyraldehyde dehydrogenase                                                         |
| PA14_37470                                         | PA2090             |                         | V125A        | flavin-dependent oxidoreductase                                                                |
| <b>PA14_50010</b>                                  |                    |                         | <b>Indel</b> | dehydrogenase                                                                                  |
| PA14_53220                                         | PA0854             | <i>fumC2</i>            | G231S        | fumarate hydratase                                                                             |
| <b>Transcription or transcriptional regulation</b> |                    |                         |              |                                                                                                |
| <b>PA14_16280</b>                                  | <b>PA3721</b>      | <b><i>nalC</i></b>      | <b>Indel</b> | transcriptional regulator NalC                                                                 |
| <b>Cell wall integrity</b>                         |                    |                         |              |                                                                                                |
| PA14_11845                                         | PA4020             | <i>mpl</i>              | P237S        | UDP-N-acetylmuramate: L-alanyl-gamma-D-glutamyl-meso-diaminopimelate ligase                    |
| <b>Virulence factors</b>                           |                    |                         |              |                                                                                                |
| <b>PA14_50160</b>                                  | <b>PA1100</b>      | <b><i>fliE</i></b>      | <b>O54*</b>  | flagellar hook-basal body protein FliE                                                         |
| PA14_63960                                         | 6                  | <i>cntO</i>             | L659P        | cntO (TonB-dependent outer-membrane protein)                                                   |
| <b>Chemotaxis / stress response</b>                |                    |                         |              |                                                                                                |
| PA14_11340                                         | PA4061             | <i>ubbN</i>             | F86S         | thioredoxin                                                                                    |
| PA14_21700                                         | PA3271             | <i>mxtR</i>             | L1068P       | two-component sensor                                                                           |
| PA14_29760                                         | PA2652/54          | <i>(tlpO)</i>           | L561P        | chemotaxis transducer                                                                          |
| <b>PA14_36020</b>                                  | <b>No</b>          |                         | <b>Indel</b> | paraquat-inducible protein B                                                                   |
| PA14_58650                                         | PA4520             |                         | T282A        | chemotaxis transducer                                                                          |
| PA14_72380                                         | PA5483             | <i>algB</i>             | R307H        | two-component response regulator AlgB                                                          |
| <b>Unknown function</b>                            |                    |                         |              |                                                                                                |
| PA14_03470                                         | PA0267             |                         | L234F        | hypothetical protein                                                                           |
| PA14_13130                                         | PA3923             |                         | P281L        | hypothetical protein                                                                           |
| PA14_15600                                         | No                 |                         | S4P          | hypothetical protein                                                                           |
| PA14_21580                                         | PA3283             |                         | N142S        | hypothetical protein                                                                           |
| <b>PA14_21630</b>                                  | <b>PA3278</b>      |                         | <b>Indel</b> | hypothetical protein                                                                           |
| PA14_21710                                         | PA3270             |                         | H171R        | hypothetical protein                                                                           |
| PA14_44100                                         | PA1578             |                         | N234S        | hypothetical protein                                                                           |
| <b>PA14_49030</b>                                  | <b>No</b>          |                         | <b>Indel</b> | hypothetical protein                                                                           |
| PA14_50070                                         | PA1106             |                         | Y204C        | hypothetical protein                                                                           |
| PA14_55380                                         | 5                  |                         | O450R        | hypothetical protein                                                                           |
| PA14_58250                                         | PA4489             | <i>magD</i>             | V898A        | hypothetical protein                                                                           |
| PA14_59480                                         | No                 | <i>modR/modE</i>        | V75A         | hypothetical protein                                                                           |

In bold, inactivating mutations

## References

1. Robert, X.; Gouet, P. Deciphering key features in protein structures with the new ENDscript server. *Nucleic Acids Res* **2014**, *42*, W320-324, doi:10.1093/nar/gku316.
2. Sievers, F.; Wilm, A.; Dineen, D.; Gibson, T.J.; Karplus, K.; Li, W.; Lopez, R.; McWilliam, H.; Remmert, M.; Soding, J.; et al. Fast, scalable generation of high-quality protein multiple sequence alignments using Clustal Omega. *Mol Syst Biol* **2011**, *7*, 539, doi:10.1038/msb.2011.75.
3. Liberati, N.T.; Urbach, J.M.; Miyata, S.; Lee, D.G.; Drenkard, E.; Wu, G.; Villanueva, J.; Wei, T.; Ausubel, F.M. An ordered, nonredundant library of *Pseudomonas aeruginosa* strain PA14 transposon insertion mutants. *Proc Natl Acad Sci U S A* **2006**, *103*, 2833-2838, doi:0511100103 [pii] 10.1073/pnas.0511100103.
4. Tetard, A.; Zedet, A.; Girard, C.; Plésiat, P.; Llanes, C. Cinnamaldehyde induces expression of efflux pumps and multidrug resistance in *Pseudomonas aeruginosa*. *Antimicrob Agents Chemother* **2019**, *63*, doi:10.1128/AAC.01081-19.
5. Herrero, M.; de Lorenzo, V.; Timmis, K.N. Transposon vectors containing non-antibiotic resistance selection markers for cloning and stable chromosomal insertion of foreign genes in Gram-negative bacteria. *J Bacteriol* **1990**, *172*, 6557-6567.
6. Lacks, S.; Greenberg, B. Complementary specificity of restriction endonucleases of *Diplococcus pneumoniae* with respect to DNA methylation. *J Mol Biol* **1977**, *114*, 153-168.
7. Ditta, G.; Stanfield, S.; Corbin, D.; Helinski, D.R. Broad host range DNA cloning system for gram-negative bacteria: construction of a gene bank of *Rhizobium meliloti*. *Proc Natl Acad Sci U S A* **1980**, *77*, 7347-7351.
8. Kaniga, K.; Delor, I.; Cornelis, G.R. A wide-host-range suicide vector for improving reverse genetics in Gram-negative bacteria: inactivation of the *blaA* gene of *Yersinia enterocolitica*. *Gene* **1991**, *109*, 137-141, doi:0378-1119(91)90599-7 [pii].
9. Hocquet, D.; Nordmann, P.; El Garch, F.; Cabanne, L.; Plésiat, P. Involvement of the MexXY-OprM efflux system in emergence of cefepime resistance in clinical strains of *Pseudomonas aeruginosa*. *Antimicrob Agents Chemother* **2006**, *50*, 1347-1351.
10. Jeannot, K.; Sobel, M.L.; El Garch, F.; Poole, K.; Plésiat, P. Induction of the MexXY efflux pump in *Pseudomonas aeruginosa* is dependent on drug-ribosome interaction. *J Bacteriol* **2005**, *187*, 5341-5346.
11. Dumas, J.L.; van Delden, C.; Perron, K.; Köhler, T. Analysis of antibiotic resistance gene expression in *Pseudomonas aeruginosa* by quantitative real-time-PCR. *FEMS Microbiol Lett* **2006**, *254*, 217-225.
